# Supplementary material for: Screening of Onion (Allium cepa L.) Genotypes for Drought Tolerance Using Physiological and Yield Based Indices Through Multivariate Analysis
Source: Front Plant Sci. 2021 Feb 9;12:600371. doi: 10.3389/fpls.2021.600371 (PMC7900547; doi:10.3389/fpls.2021.600371)
Supplement: Supplementary file 3 [file Table_2.XLS]

## Sheet: Mean Table
Genotypes		Control	Drought	Control	Drought	Control	Drought	Control	Drought	Control	Drought	Control	Drought	Control	Drought	Control	Drought	Control	Drought	Control	Drought	Control	Drought
Treatment Name	Treatment Description	AOX	AOX	Chl	Chl	LA	LA	MSI	MSI	NL	NL	PH	PH	PHE	PHE	PY	PY	RWC	RWC	TSS	TSS	YLD	YLD
1	546 DR	1.88	2.51	7.97	5.96	44.31	41.08	82.02	72.78	6.33	5.17	29.72	32.4	2.48	1.8	1.38	0.76	81.78	61.82	13.6	14	40.38	25.97
2	Acc. 1608	1.41	2.72	8.64	6.73	48.23	40.01	81.81	74.94	8.33	6.5	42.32	49.05	2.26	2.3	1.33	0.78	80.52	73.26	13.68	13.8	40.56	33.74
3	Acc. 1609	3.38	4.16	9.01	6.94	43.97	28.8	82.45	73.12	7.83	7.33	48.5	51.08	2.52	3.5	1.32	0.96	80.47	73.93	11.98	13.08	34.97	25.84
4	Acc. 1612	2.23	2.91	8.14	4.86	43.09	33.41	82.45	71.26	8.33	6.5	43.75	55.47	2.89	3.31	1.56	0.96	81.04	63.85	12.57	13.67	41.17	17.75
5	Acc. 1613	3.26	4.13	8.18	6.01	44.5	38.37	81.38	71.65	7.33	6.17	39.36	45.68	2.41	3.22	1.32	0.82	80.22	74.73	12.74	13.72	40.75	31.93
6	Acc. 1615	1.51	1.06	7.85	2.08	44.69	27.8	81.66	65.46	6.5	6.83	47.23	48.32	2.83	1.3	1.63	0.49	81.28	56.95	12.78	12.43	41.95	9.83
7	Acc. 1617	1.82	2.25	7.67	3.74	43.53	34.56	81.65	71.12	7.67	7.33	41.94	51.77	2.07	2.04	1.58	1.08	81.27	64.4	13.2	14.22	41.63	17.94
8	Acc. 1619	1.62	1.03	7.65	3.08	41.19	29.72	81.94	65.02	7.17	7.67	37.46	37.65	2.83	1.66	1.37	0.49	80.99	56.47	13.46	13.67	36.1	11.51
9	Acc. 1621	1.56	2.4	7.84	5.58	39.45	37.15	80.53	72.93	7.5	6.5	43.42	48.33	2.12	2.97	1.58	1.05	81.37	64.29	12.58	13.73	39.77	13.96
10	Acc. 1622	1.98	2.54	8.39	6.16	42.38	32.75	81.59	74.87	8.17	5.83	41.72	50.62	2.14	2.57	1.63	1.38	81.19	75.1	12.69	13.82	36.04	29.36
11	Acc. 1623	1.4	1.81	8.7	6.24	38.52	32.06	81.39	72.14	5.83	6.17	36.07	43.22	2.22	2.45	1.68	1.19	82.12	66.23	14.23	14.02	35.89	15.81
12	Acc. 1625	1.69	2.15	8.65	5.96	42.75	34.62	82.83	72.83	7.17	7.5	46.37	53.08	2.31	2.69	1.55	0.98	80.49	66.85	12.5	13.57	35.17	14.69
13	Acc. 1626	2.08	2.4	7.9	6.61	40.58	36.05	81.4	72.22	5.33	6.33	36.38	40.27	2.52	2.42	1.68	0.87	80.71	66.6	12.6	13.68	34.14	20.08
14	Acc. 1627	1.41	1.96	7.86	1.96	45.55	24.74	79.73	63.21	6.83	6.83	40.85	41.22	2.99	1.95	1.3	0.34	80.79	54.08	12.23	12.82	39.44	7.11
15	Acc. 1629	2.68	1.64	7.95	2.03	39.13	32.19	81.26	66.15	6.83	6	40.25	42	2.08	1.46	1.25	0.39	80.99	54.88	12.9	12.53	40.42	9.74
16	Acc. 1630	2.47	2.81	7.84	5.94	38.8	33.57	82.14	75.17	7.83	8	47.8	54.02	2.63	2.87	1.38	0.75	80.37	69.93	12.34	14.79	34.57	22.03
17	Acc. 1632	1.07	1.45	7.75	6.14	48.87	41.29	81.66	71.38	7	6.17	49.12	54.91	2.34	2.54	1.59	1.1	81.66	64.63	12.67	13.95	32.05	13.6
18	Acc. 1633	1.53	2.13	7.89	4.05	41.52	38.15	81.24	70.83	8.5	7.17	49.87	61.38	2.39	2.06	1.51	0.89	80.02	65.76	13.98	15.02	39.36	15.08
19	Acc. 1635	1.57	2.2	8.56	5.62	44.28	39.87	81.59	72.32	7.33	6.83	31.46	41.12	2.8	3.12	1.4	1.08	80.23	73.72	12.78	13.67	37.7	29.63
20	Acc. 1636	1.34	1.74	8.26	5.35	41.55	34.8	81.89	73.63	7.5	6.83	34.8	45.5	2.53	2.06	1.49	1.04	80.68	64.94	12.46	13.68	41.21	17.45
21	Acc. 1637	1.21	2.26	8.23	5.03	39.63	39	81.17	71.95	7.17	8	49.8	55.1	1.68	2.24	1.29	0.85	81.66	66.52	12.96	13.02	42.52	14.17
22	Acc. 1639	2.6	1.08	8.82	3.19	48.26	27.4	80.8	67.84	8.83	6.67	46.53	47.52	3.12	1.73	1.48	0.51	80.45	56.46	13.48	13.31	43.91	6.88
23	Acc. 1646	1.87	1.79	7.62	2.63	46.09	36.28	82.03	66.32	5.67	6.83	37.53	38.7	2.08	1.35	1.35	0.32	81.78	56.7	12.6	13.38	40.76	13.15
24	Acc. 1649	1.02	2.1	8.97	6.03	44.06	36.62	83.17	74.62	7.33	6.33	42.6	45.3	2.4	2.87	1.43	1.19	80.76	73.1	12.57	13.12	37.64	28.8
25	Acc. 1651	1.25	1.47	7.58	2.42	48.87	36.48	82.35	67.08	7.33	6.17	38.36	39.73	2.77	1.57	1.45	0.53	80.65	57.5	12.83	13.36	41.52	9.47
26	Acc. 1652	1.73	2.69	8.23	4.67	47.69	38.99	82.37	71.51	7.5	6.83	43.76	53.47	2.23	2.22	1.81	1.3	80.48	61.63	12.38	13.07	43.67	12.64
27	Acc. 1655	1.74	1.82	8.65	5.32	47.67	33.83	83.15	65.61	6.67	6.17	42.33	46.03	2.51	1.5	1.4	0.5	81.34	55.39	12.13	12.61	45.35	10.35
28	Acc. 1656	3.17	4.02	8.98	6.97	46.15	39.72	82.9	75.86	8	6.17	39.76	49.25	2.85	3.39	1.71	1.11	82.3	74.57	13.52	14.15	40.49	37.79
29	Acc. 1657	2.38	3.76	8.28	5.68	46.82	40.94	82.17	71.95	6	7.33	34.92	43.1	3.18	2.36	1.28	0.67	81.57	66.77	12.65	14.05	40.84	29.97
30	Acc. 1658	2.09	2.71	8.14	6.41	43.82	32.58	81.22	74.3	6.33	6	38.09	42.45	2.8	3.03	1.53	1.09	81.8	74.04	12.4	12.75	36.49	32.9
31	Acc. 1660	1.45	2.14	8.1	4.23	42.57	38.38	81.52	69.15	6.83	7.33	31.33	45.77	2.1	2.27	1.51	1.15	82.28	66.84	13	13.28	41.04	14.04
32	Acc. 1661	1.36	1.69	7.61	3.98	40.45	36.79	68.86	67.1	6.67	6.17	45.08	46.48	2.31	1.57	1.47	0.39	81.68	54.75	11.9	12.68	39.74	8.32
33	Acc. 1663	2.38	4.1	8.95	6.27	39.61	35.71	82.74	72.99	5.33	6	29.42	37.98	2.15	2.99	1.63	1.46	81.95	75.01	12.94	13.73	40.49	31.82
34	Acc. 1664	1.26	1.66	8.06	5.55	44.81	34.67	80.82	71.68	7.33	6.33	43.28	50.22	2.54	1.82	1.63	1.2	80.97	67.1	13.35	14.43	34.55	12.67
35	Acc. 1666	2.71	3.26	7.86	5.96	41.81	35.23	80.96	71.03	6.5	5.83	39.58	43.15	2.34	2.19	1.59	1.19	80.28	65.59	13.53	14.37	38.44	21.29
36	Acc. 1668	2.29	2.59	8.11	3.1	37.84	32.2	81.28	65.52	7.5	6.67	46.25	49.32	2.78	1.75	1.63	0.5	79.95	55.87	13.33	13.52	38	7.61
37	Acc. 1669	1.4	1.62	7.67	4.5	41.25	36.39	80.55	73.16	7.33	7	38.15	47.67	2.99	3.3	1.42	0.78	81.19	64.83	13.46	15	40.64	14.65
38	Acc. 1694	1.2	1.34	8.13	5.15	38.42	31.12	80.81	72.46	6.33	6.67	44.5	54.52	2.13	2.32	1.65	1.29	80.22	64.06	14.05	14.05	32.05	11.16
39	Acc. 1700	1.35	1.55	7.97	5.76	41.1	31.61	80.24	72.7	6.83	7	42.5	51.4	3.55	2.83	1.57	1.11	80.73	63.25	13.56	14.9	28.01	9.93
40	Bhima Dark Red	4.28	1.13	8.01	2.14	38.42	29.3	82.26	65.84	7.17	6.5	46.38	47.3	2.57	1.39	1.31	0.35	81.71	59.47	12.79	12.53	41.76	12.98
41	Bhima Kiran	3.8	4.57	7.98	5.51	45.07	34.48	81.44	73.6	8.33	6.33	38.68	50.13	3.14	2.8	1.45	0.79	81.71	66.13	12.95	13.72	44.98	27.22
42	Bhima Light Red	2.44	1.39	7.84	3.47	44.02	36.15	80.58	66.45	5.67	6	35.3	38.82	2.06	1.22	1.28	0.22	81.1	55.55	11.68	12.61	42.8	6.98
43	Bhima Raj	4.66	2.47	7.79	2.41	45.79	35.78	81.43	68.55	6.83	7.33	40.08	41.7	3.04	1.78	1.47	0.39	80.94	63.53	12.23	12.93	43.37	6.32
44	Bhima Red	3.47	4.12	8.05	3.8	43.08	35.02	81.79	73.97	6.5	7.5	38.42	46.58	2.64	2.95	1.66	1.1	81.8	67.64	11.86	13.15	39.97	14.61
45	Bhima Safed	2.06	2.13	7.87	4.93	50.59	36.05	80.94	72.69	6.33	7.5	39.55	44.16	2.44	1.85	0.96	0.55	80.65	67.53	11.68	12.05	39.14	13.26
46	Bhima Shakti	3.66	1.24	7.87	4.79	46.68	25.97	81.68	64.95	5.67	6.17	31.22	35.85	2.71	1.59	1.62	0.43	81.36	60.33	12.08	12.37	44.62	14.06
47	Bhima Shubhra	3.44	4.45	7.63	5.69	37.46	30.82	80.68	73.16	6	5.83	42.52	49.8	1.82	2.21	0.85	0.57	81.36	66.7	14.16	14.82	44.39	25.57
48	Bhima Shweta	1.89	2.37	8.09	6.27	42.26	36.74	81.86	71.23	6.83	6.5	33.35	49.27	2.12	2.43	0.87	0.57	81.15	69.22	12.56	13.75	43.71	24.89
49	Bhima Super	3.48	3.9	8.46	4.13	40.86	32.5	81.6	71.04	6.33	7	44.92	51.4	2.99	2.33	1.42	0.9	80.16	66.25	12.34	12.88	42.67	13.64
50	DOGR 1044 Sel	5.02	4.38	4.59	3.46	42.82	35.3	83.87	73.04	6.17	5.83	35.96	29.26	1.94	2.22	2.41	2.76	81.29	62.99	11.51	12.21	37.55	27.19
51	DOGR 1047 Sel	4.44	4.46	1.65	1.4	40.13	36.26	83.16	73.41	6.5	7.5	35.8	36.6	4.33	2.94	2.98	2.55	82.17	64.01	12.06	12.76	41.27	22.9
52	DOGR 1048 Sel	2.44	2.7	3.88	3.38	31.63	30.54	79.93	79.68	8.17	6.5	41.6	42.33	1.73	2.08	0.94	1.05	81.27	68.55	12.16	12.36	40.36	31.34
53	DOGR 1050 Sel	4.62	4.88	4.4	3.38	44.64	39.88	82.86	71.89	6.83	7.17	44.36	35.33	3.29	3.38	2.1	2.33	80.47	63.01	11.06	11.66	30.56	13.66
54	DOGR 1172-DR	4.37	5.08	3.21	2.47	38.35	38.42	85.76	77.31	7.83	7.17	45.66	38.46	2.06	2.05	2.53	2.95	80.74	62.61	10.41	11.41	35.76	15.33
55	DOGR Hy-1	4.24	4.51	3.58	3.27	39.46	38.86	82.92	72.37	7.17	7.17	41.96	34.7	2.29	2	2.23	2.21	81.17	63.58	10.56	11.56	37.59	18.05
56	DOGR Hy-2	3.99	3.71	4.46	3.8	34.91	38.71	83.13	72.57	6.5	6.5	39.26	38.1	2.86	2.41	1.88	1.93	81.7	68.02	10.41	11.21	34.35	14.3
57	DOGR Hy-441	5.14	4.01	5.31	3.4	29.11	37.66	84.72	78.32	7.5	7.83	44.23	34.53	1.87	2.48	2.48	1.83	83.58	68.5	12.71	13.11	35.58	13.45
58	DOGR Hy-5	2.27	3.26	8.6	5.77	41.2	32.73	80.88	71.19	7	7	41.76	46.37	2.59	3.15	1.56	1.19	81.7	71.57	13.15	13.4	37.81	14.95
59	DOGR Hy-50	2.7	3.52	7.69	6.73	44.81	35.31	80.78	70.11	6.33	6.5	37.88	45.67	1.86	3.05	1.72	0.9	80.14	64.36	12.05	13.4	34.65	13.94
60	DOGR Hy-6	1.41	2.97	8.22	5.94	43.89	34.4	81.09	73.08	7.33	6.33	42.42	50.33	2.97	3.12	1.61	1.03	80.46	72.35	13.61	13.97	34.43	12.12
61	DOGR Hy-7	2.11	2.51	7.9	5.36	46.39	36.54	79.75	71.43	7	5.67	42.95	52.48	2.07	2.59	1.59	0.83	80.71	63.08	12.11	13.22	34.7	14.31
62	DOGR Hy-8	1.17	1.46	8.6	4.43	39.77	36.1	83.21	71.07	6.83	6	36.22	43.52	2.37	2.48	1.57	1.04	80.53	63.26	12.89	14.13	31.5	19.94
63	KH-M-1	2.51	2.96	8.1	3.49	49.48	39.31	81.77	70.97	6.67	7	42.8	53.28	2.62	1.92	1.32	1	81.23	61.67	12.48	13.78	32.68	11.81
64	KH-M-2	2.27	2.71	7.82	4.7	36.08	30.9	81.19	71.47	8.5	5.83	36.88	43.85	2.71	2.43	1.57	0.97	81.05	64.79	12.62	13.75	36.17	16.21
65	KH-M-3	2.98	1.76	7.75	1.36	50.53	28.94	81.43	64.43	7.83	7	33.69	35.07	2.8	2.47	1.63	0.6	80.16	58.39	12.83	13.65	39.91	9.7
66	KH-M-4	2.53	1.46	7.66	1.73	43.52	36.94	81.82	66.48	6.33	6.17	37.53	40.38	2.24	1.08	1.25	0.36	81.16	58.65	12.67	12.94	40.22	10.07
67	MS 100 X B. SHWETA	4.03	4.83	7.79	6.08	43.73	38.09	82.15	71.23	6.5	7	44.25	48.52	2.26	2.22	0.91	0.69	80.94	61.56	11.97	12.92	33.49	19.09
68	MS 100 X W-361	3.57	4.3	7.33	6.44	40.04	35.01	81.46	72.84	8.33	5.5	34.7	44.07	1.95	2.34	0.76	0.41	81.2	61.82	11.53	13.27	34.99	16.71
69	MS 100 X W-448	3.93	4.95	8.03	5.81	42.23	34.45	82.31	73.95	6.67	6.5	39.38	51.42	1.87	1.99	0.73	0.56	81.85	61.97	11.81	13.38	36	20.19
70	N-2-4-1	1.43	2.31	21.33	6.76	42.45	31.29	80.31	71.17	7.5	6.33	41.92	50.62	2.43	2.24	1.26	0.98	80.78	69.37	12.03	13.03	38.26	30.72
71	P-1-3	1.53	1.99	8.11	4.85	38.94	38.21	81.57	71.09	6.83	7.33	43.64	49.2	2.88	2.05	1.57	1.21	81.26	66.21	11.99	12.98	39.38	13.87
72	Phule Safed	1.35	1.39	7.7	2.07	40.45	28.6	83.1	66.96	6.33	6.17	40.8	42.28	2.3	1.34	0.86	0.39	80.78	56.5	11.99	13.07	37.88	5.79
73	RGP-1	3.34	2.74	8.12	2.24	36.35	30.2	82.5	67.43	7.33	7.5	35.58	37.57	2.8	1.7	1.6	0.38	80.28	57.23	12.02	12.24	35.35	10.65
74	RGP-2	2.08	3	8.03	6.49	42.46	35.66	81.75	72.86	6.5	6	37.53	42.92	2.81	3.71	1.36	1.09	81.89	66.43	12.41	13.05	39.44	29.83
75	RGP-3	3.67	4.06	7.96	5.17	37.85	31.82	83.05	74.06	6.17	6.83	43.37	50.43	3.55	2.51	1.59	1.12	81.1	66.06	13.28	14.32	38.29	13.88
76	RGP-4	2.91	3.01	7.57	1.76	39.88	31.54	83.56	68.87	8.67	5.83	37.32	39.33	2.65	1.37	1.68	0.53	80.81	55.08	12.9	12.97	36.51	14
77	RGP-5	3.35	4.15	8.22	5.61	42.53	38.01	81.81	71.33	6	7.33	40.38	49.92	2.55	2.6	1.71	1.19	79.4	64.72	13.2	14.17	36.64	14.79
78	W-009	2.53	3.6	8.4	6.23	47.63	34.82	81.98	76.28	7	7	42.27	47.37	2.58	2.68	0.92	0.72	81.36	73.92	12.57	13.22	35.54	32.89
79	W-043	1.4	1.55	7.81	6.12	45.29	38.89	81.98	70.73	6.67	6.5	39.67	46.78	2.5	2.01	0.79	0.39	80.75	64.33	13.38	14.67	36.06	23.68
80	W-085	1.3	1.33	2.43	2.32	40.26	33.71	83.73	72.48	7.5	6.5	37.6	36.16	2.36	2.66	0.23	0.19	81.98	61.29	9.71	9.86	34.57	32.38
81	W-132	3.78	5.16	8.14	5.41	46.65	35.65	82.06	69.62	7.67	7.17	35.57	52.47	2.13	2.04	0.97	0.69	80.68	62.41	12.68	13.15	37.19	12.44
82	W-172	2.95	1.18	8.24	3.84	34.9	25.13	82.11	65.45	8	6.83	46.4	47.78	2.5	1.72	0.8	0.39	81	59.25	12.27	12.42	35.54	10.84
83	W-306	1.83	2.54	8.01	1.85	48.84	39.53	81.82	63.15	7.33	7.33	43.27	45.18	2.31	1.68	0.79	0.39	81.08	58.44	12.24	12.48	39.37	13.27
84	W-340	1.6	2.04	8.17	6.06	42.38	38.12	82.24	73.41	7.83	5.83	36.33	41.43	2.22	2.35	0.91	0.59	80.62	72.43	13.44	13.65	31.17	24.29
85	W-344	3.1	3.56	3.59	3.33	18.32	33.06	82.96	72.23	7.17	5.83	36.16	29.16	3.38	3.2	1.23	1.4	80.72	63.76	11.96	13.71	35.11	13.97
86	W-355	1.03	2.55	7.97	3.35	42.4	39.37	82.28	69.7	6.67	7	41.69	54.05	1.95	1.64	0.81	0.58	81.34	62.08	12.05	13	33.84	13.31
87	W-361	3.16	3.65	8.16	6.18	41.45	37.76	82.2	70.06	7.5	6.83	50.38	55.05	1.82	1.57	0.9	0.55	80.45	61.82	13.45	13.37	32.34	16.69
88	W-394	1.49	1.53	7.95	6.09	43.46	36.73	82.31	71.23	9.33	7	39.65	44.12	2.18	2.2	0.78	0.5	80.69	62.31	12.01	13.33	41.28	25.71
89	W-396	3.48	4.86	7.87	5.91	40.55	30.56	82.36	70.79	7.67	6.5	34.84	37.77	2.18	2.89	0.9	0.77	80.03	72.86	12.56	13.28	38.29	29.71
90	W-397	2.09	2.53	8.14	5.66	47.09	37.57	82.09	73.79	6	6.83	41.87	48.3	2.19	2.52	0.88	0.61	81.08	72.6	12.98	13.43	38.12	33.48
91	W-408	3.75	4.32	8.28	6.39	38.57	32.63	82.97	72.79	6.5	7	39.94	43.57	1.94	2.23	1.04	0.83	81.29	73.64	12.22	13.03	33.31	20.87
92	W-414	3.09	3.62	8.36	6.97	43.36	36.61	82.02	73.07	6.83	6.17	33.98	39.28	2.19	2.71	0.85	0.75	80.26	73.56	12.45	13.55	38.19	30.94
93	W-419	3.71	5.11	8.12	6.63	40.9	31.59	81.96	73.73	6.17	5.83	47.47	55.58	2.33	2.46	0.76	0.52	80.63	73.98	13.03	12.68	39.26	30.69
94	W-439	1.69	2.53	8.31	6.36	42.48	34.38	80.82	72.85	6.83	5.83	40.68	45.9	2.02	2.35	0.84	0.5	80.9	72.85	12.56	13.27	40.31	33.11
95	W-440	1.67	1.81	8.09	6.41	41.56	33.27	80.2	70.82	6	5.83	41.1	50.08	1.55	1.83	0.71	0.47	80.82	62.99	13.48	14.71	32.13	18.75
96	W-441	1.6	2.51	7.94	7.13	42.3	28.95	80.33	76.46	6.83	7.33	37.7	41.73	2.2	2.34	0.81	0.36	82.32	74.02	11.42	12.47	39.61	30.14
97	W-444	3.23	3.37	8.57	6.27	41.18	31.84	81.16	75.79	6	5.5	44.29	50.32	2.33	2.66	0.86	0.71	81.05	73.47	13.13	13.8	37.67	32.26
98	W-448	1.58	2.6	8.39	5.82	46.38	39.36	81.03	74.53	7	5.83	36.6	44.12	2.1	2.25	0.99	0.67	81.93	74.35	12.23	12.87	41.42	36.82
99	W-453	2.51	3.17	7.95	6.63	39.24	34.11	80.05	73.94	7.5	5.5	40.68	52.23	2.25	2.44	0.9	0.57	80.83	74.89	12.73	13.32	39.31	31.09
100	W-504	1.4	1.48	7.78	4.95	38.32	35.3	82.7	66.5	7.17	6.5	41.6	43.22	2.17	2.01	0.8	0.31	81.07	56.48	11.97	11.49	40.47	12.13
	General Mean	2.45	2.77	7.79	4.8	42.15	34.76	81.71	71.27	7.03	6.6	40.42	45.47	2.45	2.3	1.36	0.88	81.05	65.19	12.56	13.28	38.08	18.98
	p-Value	<.0001	<.0001	<.0001	<.0001	<.0001	<.0001	0.0195	<.0001	<.0001	0.0108	<.0001	<.0001	<.0001	<.0001	<.0001	<.0001	<.0001	<.0001	<.0001	<.0001	<.0001	<.0001
	CV (%)	3.1	2.99	29.19	5	3.48	3.95	2.94	0.44	9.95	13.35	5.24	4.57	4.32	5.08	2.23	3.62	0.63	0.7	1.64	1.72	3.05	4.95
	SE(d)	0.06	0.07	1.86	0.2	1.2	1.12	1.96	0.26	0.57	0.72	1.73	1.7	0.09	0.1	0.02	0.03	0.41	0.37	0.17	0.19	0.95	0.77
	LSD at 5%	0.1223	0.1334	3.6591	0.3869	2.3612	2.2082	3.8681	0.5105	1.1258	1.4179	3.4091	3.3434	0.1708	0.1885	0.0488	0.0513	0.8156	0.7299	0.3313	0.367	1.8714	1.5134
